# Supplementary material
Source: Springer Nature journal article supplement (https://www.springermedizin.de/resource/supplementary/13054_2006_5215_MOESM7_ESM.pdf/9724690)
Supplement: MOESM7 [file 9724690]

**A**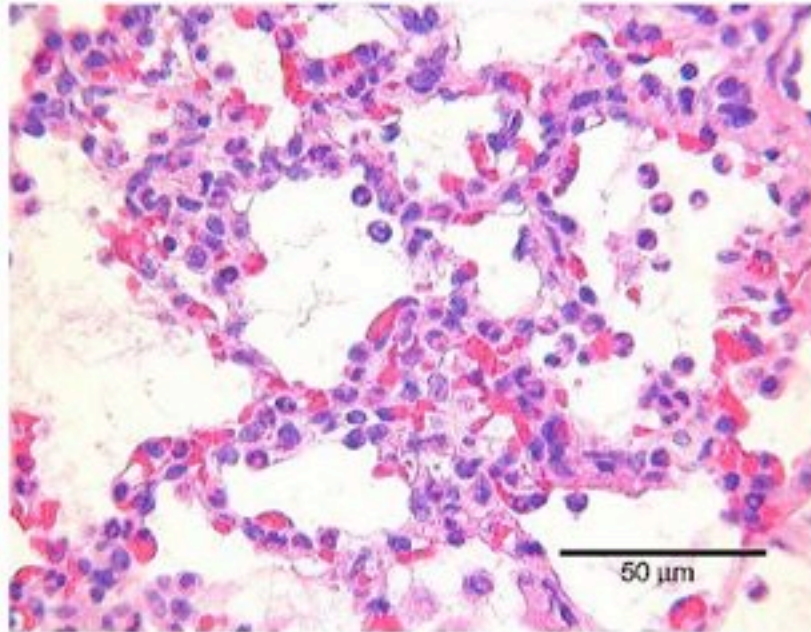**B**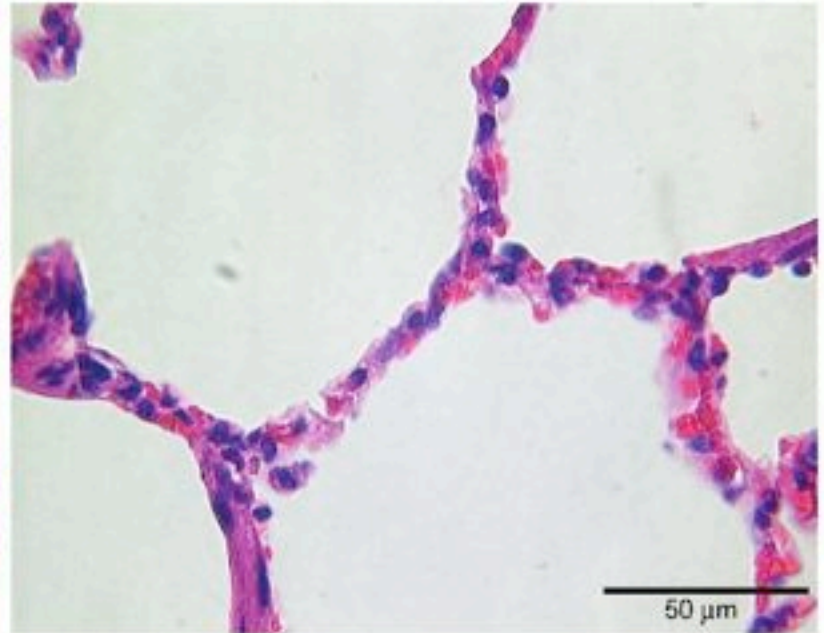

|                  | <u>Alveolar<br/>Wall Thickening</u> | <u>Intra-alveolar<br/>Edema</u> | <u>Neutrophil<br/>Infiltration</u> | <u>Wet/Dry<br/>Ratio</u> |
|------------------|-------------------------------------|---------------------------------|------------------------------------|--------------------------|
| High TV/Low PEEP | 3.25±0.16                           | 2.60±0.33                       | 120.1±15.2                         | 8.59±0.7                 |
| Low TV/High PEEP | 2.60±0.31*                          | 1.00±0.15*                      | 61.8±6.5*                          | 8.52±1.0                 |
